# Supplementary material for: High-Density Genetic Map Construction and QTL Mapping of Leaf and Needling Traits in Ziziphus jujuba Mill
Source: Front Plant Sci. 2019 Nov 22;10:1424. doi: 10.3389/fpls.2019.01424 (PMC6882864; doi:10.3389/fpls.2019.01424)
Supplement: Supplementary file 1 [file Table_1.xls]

## Sheet: Sheet1
Supplementary table S1 Quality control of sequencing data for the 103 individuals
Sample	Raw Base(bp)	Clean Base(bp)	Effective Rate(%)	Error Rate(%)	Q20(%)	Q30(%)	GC Content(%)
j-142	333309312	333270432	99.99	0.04	93.7	85	34.94
j-143	358870464	358833312	99.99	0.04	93.67	85	35.72
j-144	285691680	285659424	99.99	0.05	93.76	85	36.21
j-145	397969056	397929888	99.99	0.04	93.62	85	35.45
j-147	395961696	395915328	99.99	0.04	93.56	85	35.53
j-149	360354528	360315648	99.99	0.04	93.7	85	35.95
j-152	296202816	296176032	99.99	0.05	93.92	85	35.75
j-155	378290880	378244512	99.99	0.04	93.49	85	36.08
j-159	330886944	330851808	99.99	0.05	93.75	85	35.77
j-162	350710848	350672256	99.99	0.04	93.65	85	36.09
j-163	336109824	336072096	99.99	0.04	93.64	85	36.06
j-167	307682496	307650816	99.99	0.05	93.77	85	35.14
j-169	323588448	323554176	99.99	0.05	93.88	85	35.72
j-170	303037344	303012864	99.99	0.05	93.87	85	36.29
j-172	290124000	290097792	99.99	0.05	93.83	85	36.06
j-173	316393056	316365696	99.99	0.04	93.73	85	35.91
j-174	372250368	372210048	99.99	0.04	93.51	85	35.82
j-175	364042656	364004064	99.99	0.04	93.63	85	35.57
j-176	316475712	316450080	99.99	0.04	93.67	85	35.91
j-178	327623616	327590208	99.99	0.04	93.52	85	35.75
j-180	325604160	325568160	99.99	0.04	93.59	85	35.8
j-181	273797568	273762144	99.99	0.05	93.94	85	35.67
j-183	203828832	203802048	99.99	0.05	93.82	85	35.81
j-185	244109664	244080000	99.99	0.04	93.6	85	35.67
j-186	318724992	318689280	99.99	0.04	93.84	85	35.78
j-188	311147712	311116032	99.99	0.04	93.5	85	36.22
j-189	344297664	344259648	99.99	0.04	93.5	85	35.92
j-190	323688960	323659584	99.99	0.04	93.66	85	36.17
j-191	355908384	355876128	99.99	0.04	93.6	85	35.67
j-198	281534112	281498688	99.99	0.05	93.88	85	36.08
j-199	225652032	225627840	99.99	0.05	93.94	85	35.67
gj-4	1466937216	1466831520	99.99	0.04	94.88	87.57	36.28
j-10	384602112	384575328	99.99	0.03	95.2	88.97	35.58
j-100	391820544	391785696	99.99	0.04	95.09	88.34	36.29
j-104	353884032	353848896	99.99	0.03	95.53	89.47	36.14
j-105	410363424	410320800	99.99	0.04	95.35	88.93	36.14
j-107	362592288	362550528	99.99	0.04	95.09	88.44	35.84
j-108	417354624	417307680	99.99	0.03	95.37	89.19	36.06
j-109	326548224	326513088	99.99	0.03	95.6	89.45	36.5
j-110	333887040	333863712	99.99	0.04	94	85.86	35.88
j-111	301946976	301921632	99.99	0.04	94.84	87.69	36.34
j-112	264251808	264225888	99.99	0.03	95.42	89.11	36.04
j-113	429752448	429720192	99.99	0.04	94.73	87.48	35.95
j-116	515541888	515480544	99.99	0.03	95.48	89.44	36.13
j-117	448341696	448292160	99.99	0.03	95.4	89.22	36.09
j-123	487602432	487555200	99.99	0.03	95.36	88.97	36.35
j-125	442129536	442083456	99.99	0.03	95.41	89.15	35.99
j-126	336518784	336489696	99.99	0.04	94.69	87.23	36.41
j-127	293722272	293706720	99.99	0.04	93.98	85.91	35.98
j-132	398201184	398161728	99.99	0.04	95.2	88.59	36.11
j-134	354703968	354672864	99.99	0.04	94.69	87.39	35.92
j-135	295384320	295372800	100	0.04	93.94	85	35.89
j-138	356551488	356516352	99.99	0.04	95.1	88.53	35.86
j-140	286759584	286729632	99.99	0.04	95.12	88.48	36.02
j-17	309625920	309603168	99.99	0.03	95.5	89.66	35.47
j-18	344906784	344880864	99.99	0.03	95.19	88.8	36.17
j-2	437114304	437083776	99.99	0.04	94.93	88.38	35.53
j-22	369374688	369352800	99.99	0.04	94.11	86.39	35.75
j-23	335380320	335353248	99.99	0.03	95.56	89.81	35.97
j-26	247314528	247300704	99.99	0.04	95.17	88.82	36.2
j-27	297214848	297193824	99.99	0.03	95.32	89.18	36.31
j-29	361540224	361516032	99.99	0.03	95.16	88.87	35.88
j-3	447222528	447194880	99.99	0.03	95.19	88.92	35.8
j-32	371753280	371729664	99.99	0.04	94.7	87.78	35.09
j-35	447369984	447345792	99.99	0.03	94.78	87.72	35.61
j-39	312372288	312354432	99.99	0.04	94.67	87.52	36.31
j-40	368195616	368174304	99.99	0.04	94.56	87.4	36.16
j-41	464358528	464329152	99.99	0.04	94.9	88.24	36.06
j-45	489042432	489009312	99.99	0.03	95.17	89.06	35.75
j-47	454712832	454680864	99.99	0.03	95.1	88.69	35.85
j-48	370939392	370910304	99.99	0.03	94.95	88.41	35.66
j-49	452955744	452927232	99.99	0.03	95.12	89	35.83
j-51	437999040	437967360	99.99	0.03	95.17	88.95	35.84
j-53	409962528	409937760	99.99	0.04	93.99	86.06	36.03
j-54	341764416	341745120	99.99	0.04	94.91	88.02	36.57
j-55	502183296	502152768	99.99	0.03	95.22	88.97	35.86
j-57	564100992	564067584	99.99	0.04	94.59	87.41	35.77
j-58	534907872	534866688	99.99	0.03	95.32	89.4	36.17
j-6	268808256	268788960	99.99	0.04	95.15	88.61	36.45
j-61	527386752	527350176	99.99	0.03	95.19	89.08	36.03
j-63	618890400	618848928	99.99	0.04	95.16	88.83	36.12
j-65	450288288	450256896	99.99	0.03	95.19	88.97	35.7
j-66	429566688	429529536	99.99	0.04	94.46	87.09	36.09
j-67	432087840	432062208	99.99	0.04	93.83	85.83	35.72
j-68	395583264	395559936	99.99	0.04	95.14	88.8	35.73
j-71	349305696	349281504	99.99	0.04	94.66	87.58	36.09
j-72	329581152	329562144	99.99	0.04	93.83	85	35.13
j-73	371658528	371634336	99.99	0.03	95	88.57	35.85
j-74	386025408	385996896	99.99	0.03	94.94	88.4	35.8
j-75	384185664	384150528	99.99	0.04	95	88.21	35.91
j-77	318355200	318327264	99.99	0.03	95.43	89.03	36.55
j-78	360942624	360910368	99.99	0.04	94.96	88.05	36.09
j-81	392241312	392207904	99.99	0.03	95.32	88.89	35.9
j-82	347299200	347260320	99.99	0.03	95.55	89.43	35.98
j-84	315565920	315535680	99.99	0.04	95.22	88.57	36.34
j-85	300646080	300624768	99.99	0.04	94.13	86.16	36.03
j-88-0	308327616	308290752	99.99	0.03	95.59	89.63	36.27
j-88	235168992	235148544	99.99	0.03	95.31	88.81	36.51
j-93	294394464	294361632	99.99	0.03	95.34	88.97	36.29
j-94	302945760	302913504	99.99	0.03	95.3	88.84	36.2
j-96	274004640	273979008	99.99	0.04	94.77	87.67	35.16
j-97	399221280	399189024	99.99	0.03	94.97	87.88	35.8
j-98	314362080	314339904	99.99	0.04	94.82	87.56	36.28
j-99	330985152	330962976	99.99	0.04	94.58	87.2	36.12
wj	1592510976	1592370720	99.99	0.03	95.92	90.16	36.29
